# Supplementary material for: A non-rotatory isomerization path in ethene derivatives? Investigation of a stilbenophane and protonated azobenzenophanes (“pseudo-stilbenophanes”)Dedicated to Professor F. Dörr on the occasion of his 80th birthday.Electronic supplementary information (ESI) available: Synthesis of stilbenophane and protonated azobenzenophanes. See http://www.rsc.org/suppdata/cp/b1/b111483m/
Source: Royal Society of Chemistry journal article supplement (doi:10.1039/b111483m), 2002-04-17
Supplement: esiexperim.doc [file esiexperim.doc]

# Electronic supplementary information

for the paper

# A Non-Rotatory Isomerization Path in Ethene Derivatives?

Investigation of a Stilbenophane and Protonated Azobenzophanes (“Pseudo-Stilbenophanes”)

Hermann Rau* and Isabella Waldner

# Experimental Section

***Materials****:*

The commercially available substances were purchased and used as supplied (iso­phta­lic acid, silver sulfate, anhydrous N-methyl-pyrrolidone and tri-o-tolylphosphine from Aldrich, pal­la­di­um(II)acetate from Fluka). N(et)3 was dried by refluxing the so­lu­tion for three hours with CaH2 followed by a distillation.

**5-Bromo-isophtalic acid (1):[[1]](#endnote-2)** A mixture of isophtalic acid (12.17 g, 0.073 mol), Ag2SO4 (13.3 g, 0.043 mol) and Br2 (5ml, 0.097 mol) in conc. sulphuric acid was stir­red at 100-100°C for 32 h. The excess of Br2 was removed by distillation and the re­sidue was poured into water (500 ml, cooling). The solids, i.e. AgBr and the product were isolated by filtration and given into a NaHCO3 solution. The AgBr was removed by filtration (G4) into 6n H2SO4 where **1** precipitated. Re­crystal­lization was per­formed from acetone/water and the product was dried in vacuo to give 15.6 g (86.7%) of a white solid, m. p. 278°C (rapid heating). 1H-NMR (DMSO-d6):  = 8.23 (d, 4J = 1.43 Hz, 2H), 8.40 (t, 4J = 1.43 Hz, 1H). MS: m/z: 244(100), 227(66), 199(18), 119(7), 75(37).

**Dimethyl-5-bromo-isophtalate (2):****[[2]](#endnote-3)** A solution of conc. sulphuric acid (8 ml) in me­tha­nol (30 ml) was added dropwise to a solution of 5-bromo-isophtalic acid (13.2 g, 0.054 mol) in methanol (150 ml). The reaction mixture was refluxed for 20 h. After cooling the pro­duct was obtained as colourless crystals. After filtration, the product was washed with cold me­thanol and recrystallized from methanol to give 11.3 g (76.6%) of **2**. m. p. 83°C, 1H-NMR (CDCl3):  = 3.96 (s, 6H), 8.35 (d, 4J = 1.43 Hz, 2H), 8.6 (t, 4J = 1.43 Hz, 1H). MS: m/z 272(68), 214(100), 213(34), 198(24), 154(10), 75(80).

## 3,3’,5,5’-Tetracarboxy-methylstilbene (3):[[3]](#endnote-4) The following reaction was performed by the group of Prof. Dr. A.de Meijere at the University of Göttingen according to li­te­ra­ture pro­ce­dures (Heck reactions) for similar products. The educt 2 (9 g, 33 mmol) was filled in a glass au­to­clave (300 ml) together with palladium(II)acetate (0.074 g, 0.33 mmol) and tri-o-tolyl­phos­phine (0.2 g, 0.66 mmol). The reaction chamber was eva­cu­a­ted a few times and filled with N2. In the next step, anhydrous N(et)3 (9.9 ml, 71.1 mmol) and N-methyl-pyrrolidone (9.9 ml) were added under inert atmos­phere. Finally the autoclave was filled with ethene at a pressure of 1.5 bar. In or­der to sa­tu­ra­te the solution with ethene, this procedure was re­pea­ted five times. The re­action was then performed at a pressure of ethene of 1.5 bar at a tem­perature of 100°C for 25.5 h. After cooling the nearly solid product was ex­trac­ted with CH2Cl2 (450 ml) and washed with water. The organic layer was separated, dried with MgSO4 and con­cen­tra­ted in vacuo. The solution was chromato­graphed on silica gel with CH2Cl2 to give 2.97 g (7.2 mmol, 22%) of a slight yellow solid. m.p. 213°C (ra­pid heating). 1H-NMR (CDCl3):  = 3.98 (s, 12H), 7.131 (s, 2H), 8.39 (d, 4J = 1.54Hz, 4H), 8.60 (t, 4J = 1.54Hz, 2H). MS: m/z 412(100), 381(38), 321(12), 220(22), 175(20).

**3,3’,5,5’-Tetrahydoxy-methylstilbene (4):[[4]](#endnote-5)** A solution of **3** (1.2 g, 2.94 mmol) in dry THF (15 ml) was added dropwise under inert atmosphere (Ar) to a suspension of LiAlH4 (0.47 g, 12.4 mmol) in dry THF (3 ml). The reaction mixture was refluxed for one hour. In order to se­pa­rate the organic phase, a saturated aqueous solution of Na2SO4 was added slowly, with cooling. The organic layer was dried with Na2SO4, filtrated, con­centrated and dried in vacuo to give 0.83 g (94%) of a white solid with a m.p. of 198°C. 1H-NMR (CD3OD):  = 4.89 (s, 8H), 7.27 (s, 2H), 7.3 (s, 2H), 7.51 (s, 4H). MS: m/z 300(100), 205(88), 178(36), 165(21), 115816), 91(12).

**3,3’,5,5’-Tetrabromo-methylstilbene (5):[[5]](#endnote-6)** A mixture of **4** (0.8 g, 2.6 mmol),CBr4 (6.95­ g, 20.1 mmol), P(phenyl)3 (5.62 g, 21.4 mmol) in 17.5 ml DMF was stirred at room tem­perature for 2 days. The solvent was removed by distillation in vacuo. In the next step, ethanol was added to the dark brown residue, the remaining solid was se­pa­ra­­­ted by filtration and dissolved in CH2Cl2. This solution was chromatographed on silica gel with a CH2Cl2 / toluene mixture to give **5** (60%) as a white solid with a m. p. of 224­-226°C. 1H-NMR (CDCl3):  = 4.5 (s, 8H), 7.11 (s, 2H), 7.18 (s, 2H), 7.47 (4H). MS: m/z 552(86), 473(100), 392(16), 311(14), 230(50), 202(58), 115(18).

**3,3’,5,5’-Tetramercapto-methylstilbene (6):[[6]](#endnote-7) 5** (0.4 g, 0.73 mmol) was dissolved in de­­gassed DMSO. The solution was stirred under Ar atmosphere for one hour and in the next step thio­u­rea (0.24 g, 3.2 mmol) was added. The reaction mixture was stirred over night at room tem­pe­ra­ture under inert atmosphere. A cold and degassed aque­ous solution of NaOH (3 g in 30 ml wa­ter) was added dropwise to the reaction mix­ture, which was stirred for another 2 h. Finally, 2n HCl was added and the organic phase was extracted with CH2Cl2. After removal of the sol­vent, the product **6** (a white solid) was used without any further purification. 1H-NMR (CDCl3):  = 2.61 (s, 4H), 3.75 (d, 3J = 7.6Hz, 8H), 7.1 (s, 2H), 7.2 (s, 2H), 7.36 (s, 4H). MS: m/z 364(100), 331(64), 297­(24), 263(34), 217(79), 189(28).

**2,19,36,39-Tetrathia[3.3.3.3](3,3’,5,5’)-stilbeno<4>phane (7):Error: Reference source not found** To a stirred solution of KOH (0.185 g, 3.3 mmol) in degassed mixture of ethanol (300 ml) and toluene (700 ml) a so­lu­tion of **5** (0.19 g, 0.35 mmol) and **6** (0.13 g, 0.35 mmol) in degassed toluene (1000 ml) was added dropwise under inert atmosphere. The reaction mix­ture was refluxed over night and the solid was se­pa­rated by filtration. The product was washed a few times with various solvents (H2O, ethanol, toluene and methylen­chlorid) and chro­ma­to­graphed on silica gel with CHCl3. As the cy­clo­phane **7** shows a green fluorescence, this fact can be persecuted during the chroma­to­gra­phic work. MS: m/z 592­(100), 296(18), 236(12), 202 (22). As the solubility of the cy­clophan **7** is very poor, we could not get a NMR spectrum free of interfering signals. With a caveat we assign the signals at 7.1 ppm to the p-H of the phenylrings, 7.04 and 7.01 to the o-H, 6.38 ppm to the ethylenic H and 3.85 to 3.94 to the methylene group. The CH2- hydrogens appear to be not isochronous and they show coupling to the p-phenyl-H atoms. We have to as­sume that **7** has no centre of inversion.

### Literature

1. E. W. Crandall and L. Harris, *Org. Prep. Proc.***1969*,*** *1*, 147. [↑](#endnote-ref-2)
2. S. A. Sherrod, R. L. Da Costa, R. A. Barnes and V. Boeckelheide, *J. Am. Chem. Soc.* **1974*,*** *96,* 1565. [↑](#endnote-ref-3)
3. J. E. Plevyak and R. F. Heck, *J. Org. Chem.* **1978***, 43*, 2454. [↑](#endnote-ref-4)
4. J. C. Rosa, D. Galanakis, C. R. Ganellin and P. M. Dunn, *J. Med. Chem.* **1996***, 39*, 4247. [↑](#endnote-ref-5)
5. A. Pawda, A. Ku, H. Ku and A. Mazzu, *J. Org. Chem*. **1978**, *43*, 66. [↑](#endnote-ref-6)
6. T. Xiao, Q. Ye and L. Sun, *J. Phys. Chem. B* **1997***, 101*, 632. [↑](#endnote-ref-7)
